# Supplementary material for: A new Mumm-type rearrangement with dithiocarbamates via isocyanide-based multicomponent reaction under ultrasound irradiation: synthesis of polysubstituted pyrrolidine compounds
Source: Royal Society of Chemistry journal article supplement (doi:10.1039/d0nj00691b), 2020-01-01

# **A New Mumm-type Rearrangement with Dithiocarbamates via Isocyanide- Based Multicomponent Reaction under Ultrasound Irradiation: Synthesis of Polysubstituted Pyrrolidine Compounds**

**F. Matloubi Moghaddam,<sup>\*a</sup> M. Goudarzi<sup>a</sup>, F. Chamani<sup>a</sup>, H. Mohammadzadeh Dezag**

*<sup>a</sup>Laboratory of Organic Synthesis and Natural Products, Department of Chemistry,*

*Sharif University of Technology, Azadi Street, PO Box 111559516 Tehran, Iran*

*\*E-mail Address: [matloubi@sharif.edu](mailto:matloubi@sharif.edu)*

## **Supporting Information**

### **Table of Contents**

|                                                                                |          |
|--------------------------------------------------------------------------------|----------|
| <b>1. Experimental Section.....</b>                                            | <b>2</b> |
| <b>2. Characterization Data of Products 5a-5l .....</b>                        | <b>3</b> |
| <b>3. <sup>1</sup>H NMR, <sup>13</sup>C NMR pectra of Products 5a-5l .....</b> | <b>9</b> |

## Experimental Section

All materials used are commercially available and were purchased from Merck and used without any additional purification.  $^1\text{H}$  NMR and  $^{13}\text{C}$  NMR spectra were recorded on a Bruker (Avance DRX-500) spectrometer using  $\text{CDCl}_3$ ,  $\text{DMSO-d}_6$ , and  $\text{Acetone-d}_6$  as solvent at room temperature. Chemical shifts  $\delta$  were reported in ppm relative to tetramethylsilane as an internal standard. FTIR spectra of samples were taken using an ABB Bomem MB-100 FTIR spectrophotometer.

### General procedure for the formation of product 5:

To a mixture of secondary amines 1 (1.00 mmol), carbon disulfide 2 (2.00 mmol) in MeOH (1.5 mL), *gem*-dicyano olefins 3 (1.00 mmol) and alkyl isocyanide 4 was added and the mixture subjected to ultrasound irradiation (45 kHz) for 45-120 min at room temperature. After completion of the reaction (45- 120 min), as monitored by TLC (ethyl acetate: *n*-hexane, 1:3), the product was filtered and washed with water and EtOH. The products with high purity were obtained in most cases and did not require further purification by column chromatography.

### Characterization Data of Products (5a-5l)

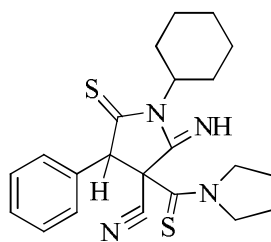

#### 3-cyano-1-cyclohexyl-N, N-diethyl-2-imino-4-phenyl-5-thioxopyrrolidine-3-carbothioamide (5a)

**5a:** White solid; mp: 181-182 °C; yield 82% (338 mg);  $^1\text{H}$  NMR (500 MHz, Acetone- $d_6$ )  $\delta$  1.29 (t,  $J=7.4$  Hz, 4H), 1.40 (t,  $J=7.0$  Hz, 5H), 1.70-1.73 (m, 1H), 1.81-1.84 (m, 1H), 1.88-1.94 (m, 3H), 2.67-2.75 (m, 1H), 2.78-2.84 (m, 1H), 3.83-4.12 (m, 4H), 4.54 (s, 1H), 5.04 (t,  $J=12.0$  Hz, 1H), 7.33 (d,  $J=7.2$  Hz, 2H), 7.42-7.49 (m, 3H), 9.70 (s, 1H) ppm;  $^{13}\text{C}$  NMR (100 MHz, Acetone- $d_6$ )  $\delta$  9.7, 11.8, 25.3, 25.7, 25.9, 26.0, 27.6, 48.3, 49.0, 58.4, 62.1, 66.4, 115.4, 128.1, 129.1, 129.4, 136.9, 154.0, 188.8, 203.1 ppm; IR (KBr):  $\nu$  3715, 3270, 2923, 1720, 1666, 1498, 1398, 1183, 1068  $\text{cm}^{-1}$ ; Anal. calcd for  $\text{C}_{22}\text{H}_{28}\text{N}_4\text{S}_2$ : C, 64.04; H, 6.84; N, 13.58; Found: C, 64.01; H, 7.07; N, 13.21%.

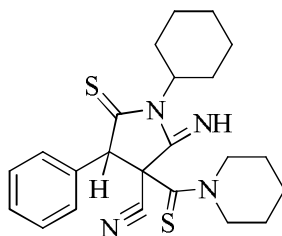

#### 1-cyclohexyl-2-imino-4-phenyl-3-(piperidine-1-carbonothioyl)-5-thioxopyrrolidine-3-carbonitrile (5b)

**5b:** Orange solid; mp: 156-158 °C; yield 89% (378 mg);  $^1\text{H}$  NMR (500 MHz, DMSO- $d_6$ )  $\delta$  1.14-1.39 (m, 6H), 1.61-1.85 (m, 8H), 2.59-2.72 (m, 1H), 3.35-3.37 (m, 1H), 3.55-3.57 (m, 1H), 3.74-3.78 (m, 1H), 3.93-3.96 (m, 1H), 4.71 (s, 1H), 4.75-7.78 (m, 1H), 4.89-4.94 (m, 1H), 7.20 (d,  $J=5.0$  Hz, 2H), 7.39-7.47 (m, 3H), 10.45 (s, 1H) ppm;  $^{13}\text{C}$  NMR (100 MHz, DMSO- $d_6$ )  $\delta$  23.5, 24.0, 25.3, 25.5, 25.9, 26.1, 26.3, 27.9, 53.3, 53.9, 58.4, 61.6, 65.2, 115.7, 128.4, 129.5, 129.8, 137.1, 162.6, 187.8, 203.4 ppm; IR (KBr):  $\nu$  3280, 2993, 2858, 2664,

2240, 1665, 1449, 1390  $\text{cm}^{-1}$ ; Anal. calcd for  $\text{C}_{23}\text{H}_{28}\text{N}_4\text{S}_2$ : C, 65.06; H, 6.65; N, 13.19; Found: C, 64.78 ; H, 6.68; N, 12.92%.

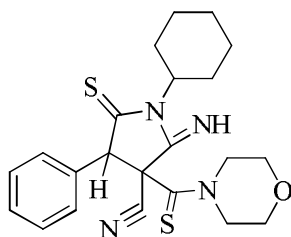

**1-cyclohexyl-2-imino-3-(morpholine-4-carbonothioyl)-4-phenyl-5-thioxopyrrolidine-3-carbonitrile (5c)**

**5c:** White solid; mp: 198-200 °C; yield 94% (401 mg);  $^1\text{H}$  NMR (500 MHz,  $\text{DMSO-}d_6$ )  $\delta$  1.27-1.43 (m, 3H), 1.70-1.83 (m, 2H), 1.89-1.94 (m, 3H), 2.67-2.78 (m, 2H), 3.74-4.13 (m, 8H), 4.61 (s, 1H), 5.04 (t,  $J = 12$  Hz, 1H), 7.29 (d,  $J = 5.0$  2H), 7.42-7.48 (m, 3H), 9.70 (s, 1H),  $^{13}\text{C}$  NMR (100 MHz,  $\text{DMSO-}d_6$ )  $\delta$  25.4 , 25.8 , 26.1 , 26.3 , 27.9 , 52.1 , 53.6 , 58.4 , 61.3, 65.0, 66.0, 115.9, 128.5, 129.5, 129.9, 136.9 , 162.4, 189.2, 203.4 ppm; IR (KBr):  $\nu$  3281, 3031, 2929, 2856, 2247, 1905, 1664, 1440, 1388  $\text{cm}^{-1}$ ; Anal. calcd for  $\text{C}_{22}\text{H}_{26}\text{N}_4\text{OS}_2$ : C, 61.94; H, 6.14; N, 13.13; Found: C, 61.76; H, 6.19; N, 12.77%.

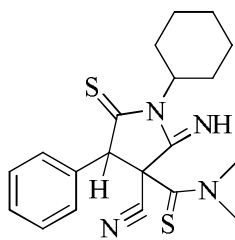

**3-cyano-1-cyclohexyl-2-imino-N,N-dimethyl-4-phenyl-5-thioxopyrrolidine-3-carbothioamide (5d)**

**5d:** Pale yellow solid; mp: 220-222 °C; yield 71% (273 mg);  $^1\text{H}$  NMR (500 MHz,  $\text{DMSO-}d_6$ )  $\delta$  1.17-1.32 (m, 3H), 1.65-1.88 (m, 5H), 2.59-2.72 (m, 2H), 3.32 (s, 3H), 3.39 (s, 3H), 4.87 (s, 1H), 4.89-4.94 (m, 1H), 7.24 (d,  $J = 10.0$  Hz , 2H), 7.38-7.46 (m, 3H), 10.36 (s, 1H) ppm;  $^{13}\text{C}$  NMR (100 MHz,  $\text{DMSO-}d_6$ )  $\delta$  25.5, 25.8, 26.1, 26.3, 27.9, 45.3, 46.3, 58.4, 61.0, 64.7, 72.3, 115.4, 128.4, 129.4, 129.8, 137.3, 162.7, 188.6, 203.7 ppm; IR (KBr):  $\nu$

3272, 2930, 2055, 2241, 1665, 1516, 1390  $\text{cm}^{-1}$ ; Anal. calcd for  $\text{C}_{20}\text{H}_{24}\text{N}_4\text{S}_2$ : C, 62.47; H, 6.29; N, 14.57; Found: C, 62.24; H, 6.74; N, 14.41%.

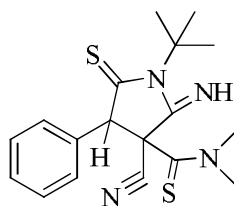

**1-(tert-butyl)-3-cyano-2-imino-N,N-dimethyl-4-phenyl-5-thioxopyrrolidine-3-carbothioamide (5e)**

**5e:** Yellow solid; mp: 168-170  $^{\circ}\text{C}$ ; yield 92% (330 mg);  $^1\text{H}$  NMR (500 MHz,  $\text{CDCl}_3$ )  $\delta$  1.98 (s, 9H), 3.49 (s, 3H), 3.53 (s, 3H), 4.31 (s, 1H), 7.19-7.20 (m, 2H), 7.43-7.44 (m, 3H), 9.14 (brs, 1H) ppm;  $^{13}\text{C}$  NMR (100 MHz,  $\text{CDCl}_3$ )  $\delta$  28.1, 44.4, 45.9, 59.9, 65.0, 66.7, 114.7, 127.7, 129.4, 129.7, 136.7, 165.0, 189.1, 202.3 ppm; IR (KBr):  $\nu$  3112, 3073, 3019, 2834, 2034, 1895, 1602, 1525  $\text{cm}^{-1}$ ; Anal. calcd for  $\text{C}_{18}\text{H}_{22}\text{N}_4\text{S}_2$ : C, 60.30; H, 6.19; N, 15.63; Found: C, 60.14; H, 6.31; N, 15.48%.

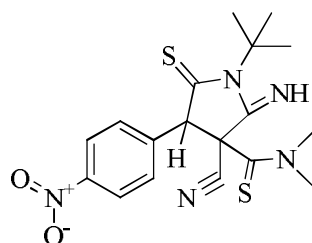

**1-(tert-butyl)-3-cyano-2-imino-N,N-dimethyl-4-(4-nitrophenyl)-5-thioxopyrrolidine-3-carbothioamide (5f)**

**5f:** Pale yellow solid; mp: 180-182  $^{\circ}\text{C}$ ; yield 96% (387 mg);  $^1\text{H}$  NMR (500 MHz,  $\text{CDCl}_3$ )  $\delta$  1.95(s, 9H), 3.52 (s, 3H), 3.54 (s, 3H), 4.60 (s, 1H), 7.39 (d,  $J = 10$  Hz, 2H), 8.29 (d,  $J = 10$  Hz, 2H), 9.16 (brs, 1H) ppm;  $^{13}\text{C}$  NMR (100 MHz,  $\text{DMSO}-d_6$ )  $\delta$  28.1, 45.2, 46.4, 64.3, 64.4, 64.9, 115.0, 124.9, 130.5, 144.9, 148.0, 162.5, 187.5, 202.3 ppm; IR (KBr):  $\nu$  3738, 3362, 3085, 2984, 1691, 1609, 1527, 1421  $\text{cm}^{-1}$ ; Anal. calcd for  $\text{C}_{18}\text{H}_{21}\text{N}_5\text{O}_2\text{S}_2$ : C, 53.58; H, 5.25; N, 17.36; Found: C, 53.44; H, 5.51; N, 16.93%.

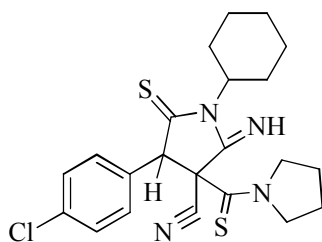

**4-(4-chlorophenyl)-1-cyclohexyl-2-imino-3-(pyrrolidine-1-carbonothioyl)-5-thioxopyrrolidine-3-carbonitrile (5g)**

**5g:** White solid; mp: 181-182 °C; yield 71% (316 mg);  $^1\text{H}$  NMR (500 MHz, DMSO  $-d_6$ )  $\delta$  1.18-1.32 (m, 4H), 1.65-2.21 (m, 9H), 2.61-2.64 (m, 1H), 3.61-3.76 (m, 4H), 4.89-4.96 (m, 1H), 5.09 (s, 1H), 7.28 (d,  $J = 10.0$  Hz, 2H), 7.52 (d,  $J = 10.0$  Hz, 2H), 10.44 (s, 1H) ppm;  $^{13}\text{C}$  NMR (100 MHz, DMSO  $-d_6$ ) 23.6, 25.5, 25.8, 26.1, 26.3, 27.0, 53.9, 57.4, 58.4, 63.8, 115.2, 129.7, 130.6, 134.0, 136.7, 162.4, 185.3, 203.6 ppm; IR (KBr):  $\nu$  3081, 3007, 2932, 2834, 1901, 1605, 1525, 1474, 1245  $\text{cm}^{-1}$ ; Anal. calcd for  $\text{C}_{22}\text{H}_{25}\text{ClN}_4\text{S}_2$ : C, 59.37; H, 5.66; N, 12.59; Found: C, 59.12; H, 5.76; N, 12.29%.

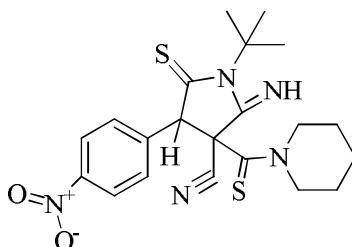

**1-(tert-butyl)-2-imino-4-(4-nitrophenyl)-3-(piperidine-1-carbonothioyl)-5-thioxopyrrolidine-3-carbonitrile (5h)**

**5h:** White solid; mp: 198-200 °C; yield 96% (428 mg);  $^1\text{H}$  NMR (500 MHz,  $\text{CDCl}_3$ )  $\delta$  1.94 (s, 9H), 3.86-4.04 (m, 8H), 4.64 (s, 1H), 7.37 (d,  $J = 8.0$  Hz, 2H), 8.30 (d,  $J = 8.0$  Hz, 2H), 9.38 (brs, 1H) ppm;  $^{13}\text{C}$  NMR (100 MHz,  $\text{CDCl}_3$ )  $\delta$  28.0, 52.1, 52.2, 52.7, 53.0, 66.20, 66.2, 114.8, 124.8, 129.3, 143.1, 148.3, 155.3, 188.4, 200.3 ppm; IR (KBr):  $\nu$  3383, 3279, 3077, 2975, 2926, 1936, 1668, 1604, 1529, 1359  $\text{cm}^{-1}$ ; Anal. calcd for  $\text{C}_{20}\text{H}_{23}\text{N}_5\text{O}_3\text{S}_2$ : C, 53.91; H, 5.20; N, 15.72; Found: C, 53.77; H, 5.49; N, 15.47%.

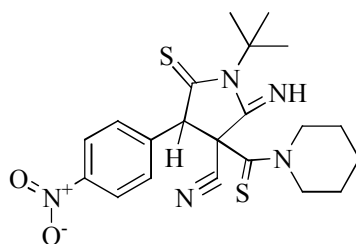

**1-(tert-butyl)-2-imino-4-(4-nitrophenyl)-3-(piperidine-1-carbonothioyl)-5-thioxopyrrolidine-3-carbonitrile (5i)**

**5i:** White solid; mp: 168-170 °C; yield 77% (342 mg);  $^1\text{H}$  NMR (500 MHz,  $\text{CDCl}_3$ )  $\delta$  1.79-1.85 (m, 6H), 1.97 (s, 9H), 3.57-3.93 (m, 3H), 4.47 (s, 1H), 4.55-4.61 (m, 1H), 7.36 (d,  $J = 5.0$  Hz, 2H), 8.29 (d,  $J = 5.0$  Hz, 2H) ppm;  $^{13}\text{C}$  NMR (100 MHz,  $\text{CDCl}_3$ )  $\delta$  23.3, 23.6, 25.2, 25.7, 28.0, 52.3, 53.7, 66.2, 114.8, 123.1, 124.8, 129.1, 130.6, 143.5, 187.2, 200.3 ppm; IR (KBr):  $\nu$  3315, 3273, 2931, 2856, 2241, 1998, 1666, 1518, 1391  $\text{cm}^{-1}$ ; Anal. calcd for  $\text{C}_{21}\text{H}_{25}\text{N}_5\text{O}_2\text{S}_2$ : C, 56.86; H, 5.68; N, 15.79; Found: C, 56.64; H, 5.97; N, 15.63%.

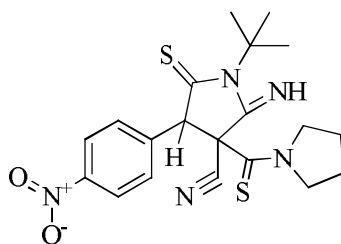

**1-(tert-butyl)-2-imino-4-(4-nitrophenyl)-3-(pyrrolidine-1-carbonothioyl)-5-thioxopyrrolidine-3-carbonitrile (5j)**

**5j:** White solid; mp: 188-190 °C; yield 84% (361 mg);  $^1\text{H}$  NMR (500 MHz,  $\text{CDCl}_3$ )  $\delta$  1.94 (s, 9H), 2.07-2.21 (m, 4H), 3.75-4.06 (m, 4H), 4.88 (s, 1H), 7.40 (d,  $J = 8.0$  Hz, 2H), 8.28 (d,  $J = 8.0$  Hz, 2H), 9.12 (s, 1H) ppm;  $^{13}\text{C}$  NMR (100 MHz,  $\text{CDCl}_3$ )  $\delta$  23.5, 27.2, 28.0, 53.1, 57.0, 66.6, 114.2, 124.7, 129.2, 143.6, 148.2, 163.9, 184.4, 200.5 ppm; IR (KBr): 3070, 2954, 2873, 1685, 1575, 1431, 1337  $\text{cm}^{-1}$ ; Anal. calcd for  $\text{C}_{20}\text{H}_{23}\text{N}_5\text{O}_2\text{S}_2$ : C, 55.92; H, 5.40; N, 16.30; Found: C, 55.89; H, 5.57; N, 16.05%.

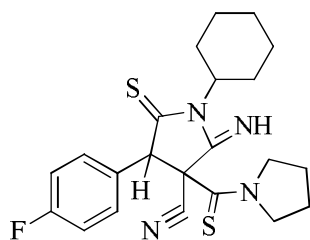

**1-cyclohexyl-4-(4-fluorophenyl)-2-imino-3-(pyrrolidine-1-carbonothioyl)-5-thioxopyrrolidine-3-carbonitrile (5k)**

**5k:** White solid; mp: 200-202 °C; yield 84% (360 mg);  $^1\text{H}$  NMR (500 MHz,  $\text{CDCl}_3$ )  $\delta$  1.30-1.43 (m, 3H), 1.71-1.74 (m, 1H), 1.83-2.19 (m, 8H), 2.53-2.68 (m, 2H), 3.62-3.99 (m, 4H), 4.52 (s, 1H), 4.99 (t,  $J = 15.0$  Hz, 1H), 7.13 (t,  $J = 10.0$  Hz, 2H), 7.19 (t,  $J = 5.0$  Hz, 2H), 8.82 (s, 1H) ppm;  $^{13}\text{C}$  NMR (100 MHz,  $\text{CDCl}_3$ )  $\delta$  23.6, 25.2, 25.8, 26.0, 26.5, 27.2, 27.9, 53.5, 56.8, 58.9, 65.8, 114.7, 116.6, 116.8, 129.8, 132.1, 164.1, 185.7, 202.3 ppm; IR (KBr):  $\nu$  3081, 3007, 2932, 2834, 1901, 1605, 1525, 1474, 1245  $\text{cm}^{-1}$ ; Anal. calcd for  $\text{C}_{22}\text{H}_{25}\text{FN}_4\text{S}_2$ : C, 61.65; H, 5.88; N, 13.07; Found: C, 61.44; H, 6.12; N, 12.71%.

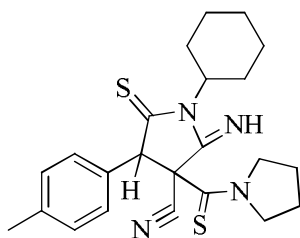

**1-cyclohexyl-2-imino-3-(pyrrolidine-1-carbonothioyl)-5-thio-4-(p-tolyl)pyrrolidine-3-carbonitrile (5l)**

**5l:** White solid; mp: 195-197 °C; yield 56% (238 mg);  $^1\text{H}$  NMR (500 MHz,  $\text{CDCl}_3$ )  $\delta$  1.28-1.46 (m, 3H), 1.72 (d,  $J = 10.0$  Hz, 1H), 1.85-1.98 (m, 5H), 2.09-2.17 (m, 3H), 2.37 (s, 3H), 2.56-2.74 (m, 2H), 3.57-3.96 (m, 4H), 4.38 (s, 1H), 5.00 (t,  $J = 10.0$  Hz, 1H), 7.08 (d,  $J = 10.0$  Hz, 2H), 7.23 (d,  $J = 5.0$  Hz, 2H), 8.73 (brs, 1H) ppm;  $^{13}\text{C}$  NMR (100 MHz,  $\text{CDCl}_3$ )  $\delta$  21.2, 23.6, 25.3, 25.9, 26.0, 26.4, 27.2, 27.9, 53.5, 56.7, 58.9, 62.7, 66.3, 114.8, 127.5, 130.3,



133.3, 139.5, 164.4, 185.9, 202.9 ppm; IR (KBr):  $\nu$  3277, 3024, 2929, 2854, 1670, 1511, 1474, 1444, 1347, 1173  $\text{cm}^{-1}$ ; Anal. calcd for  $\text{C}_{23}\text{H}_{28}\text{N}_4\text{S}_2$ : C, 65.06; H, 6.65; N, 13.19 Found: C, 64.85; H, 6.92; N, 12.98%.

### Characterization Data of Products (5a-5l)

#### 5a: $^1\text{H}$ NMR (500MHz, Acetone- $d_6$ )

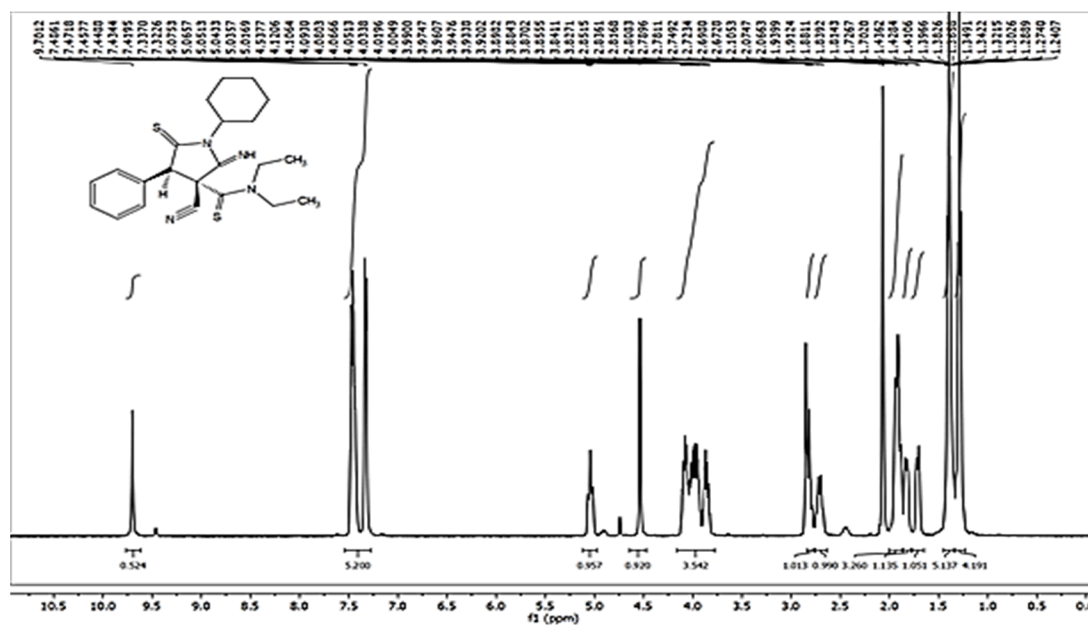

5a:  $^{13}\text{C}$  NMR (100MHz, Acetone - $d_6$ )

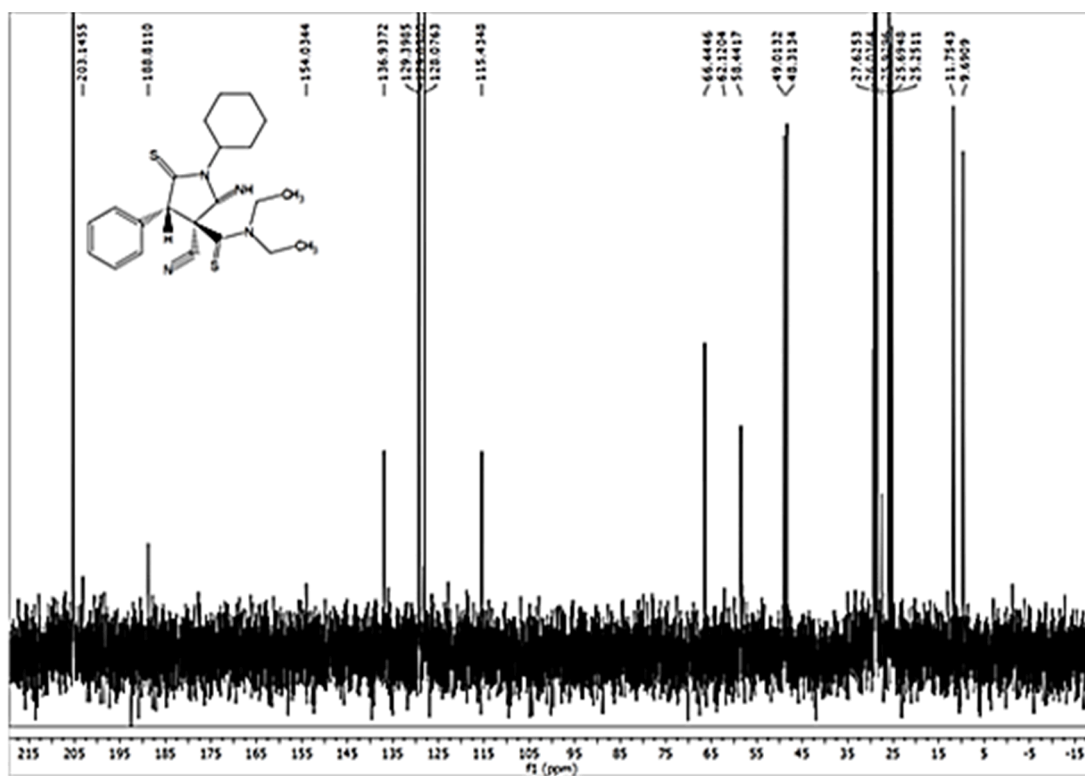

**5b:**  $^1\text{H}$  NMR (500 MHz,  $\text{DMSO-}d_6$ )

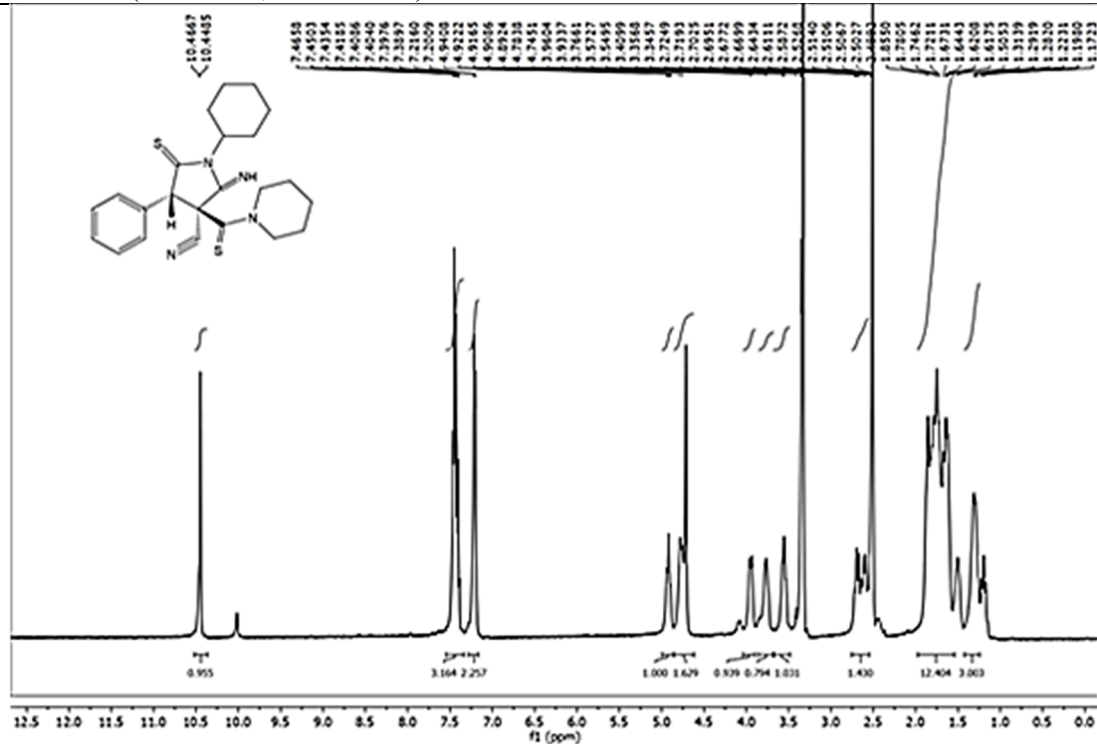

**5b:**  $^{13}\text{C}$  NMR (100 MHz,  $\text{DMSO-}d_6$ )

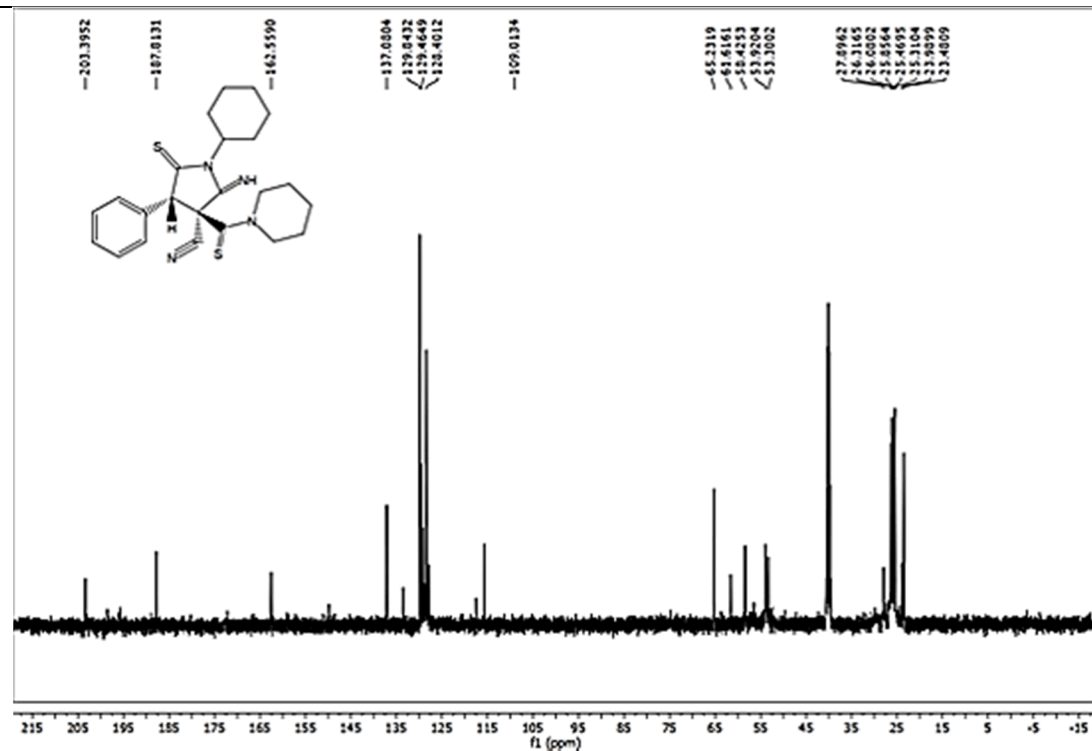

**5c:**  $^1\text{H}$  NMR (500 MHz,  $\text{DMSO-}d_6$ )

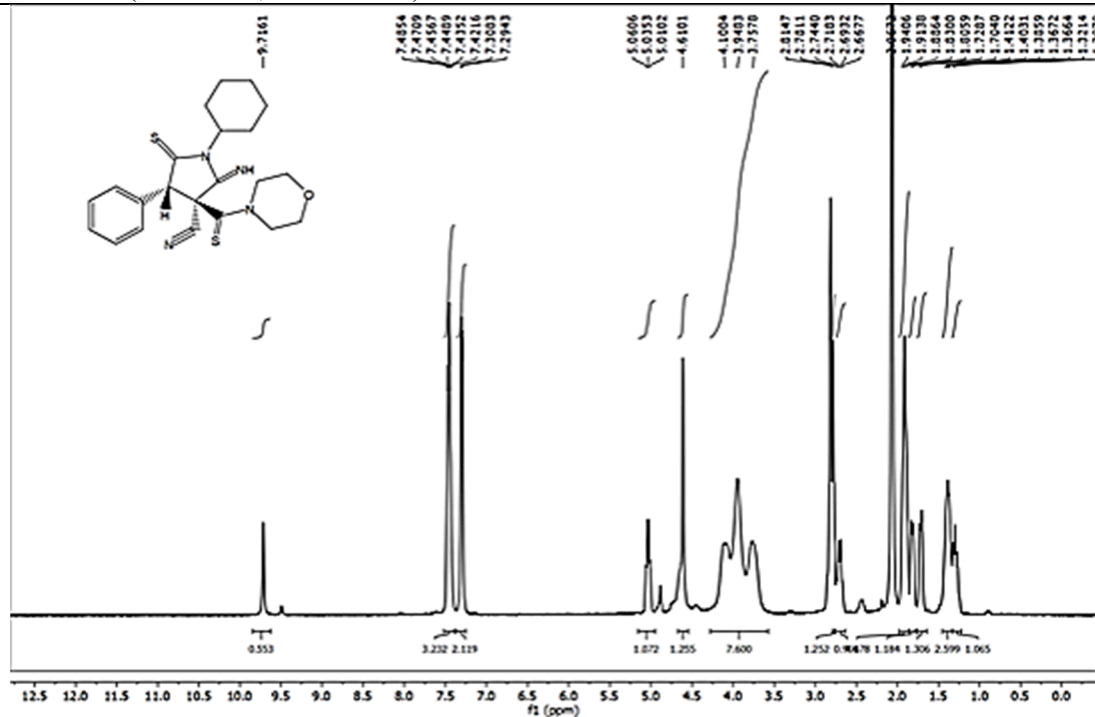

**5c:**  $^{13}\text{C}$  NMR (100 MHz,  $\text{DMSO-}d_6$ )

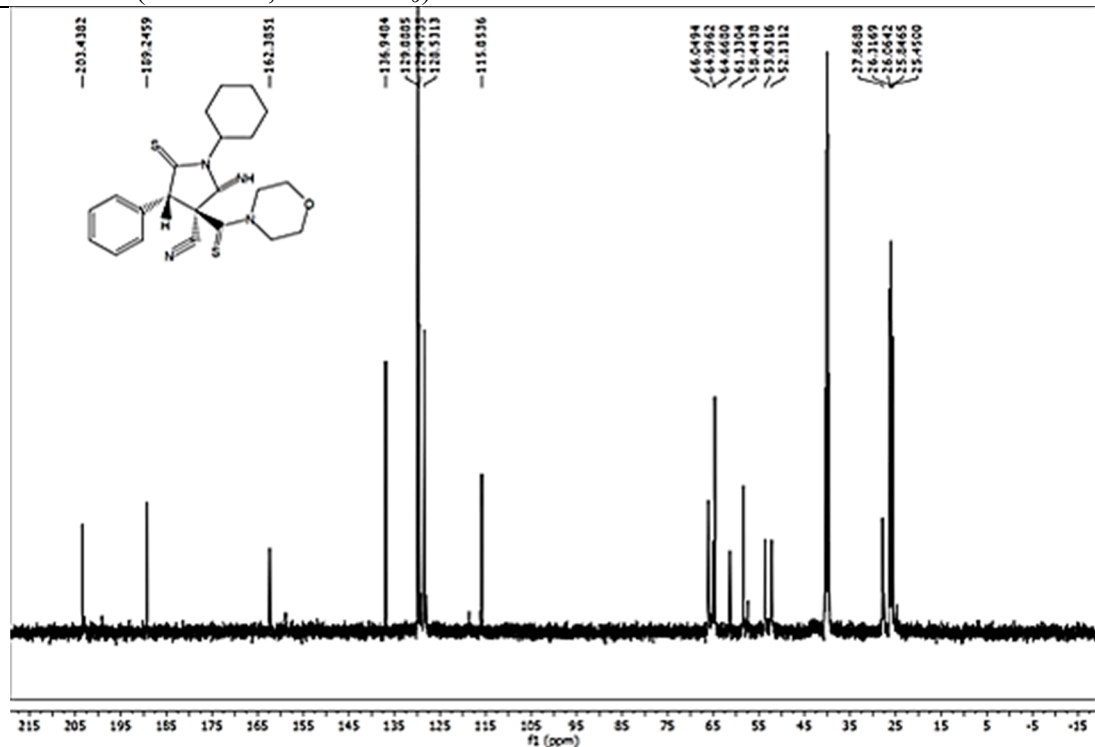

**5d:**  $^1\text{H}$  NMR (500 MHz,  $\text{DMSO-}d_6$ )

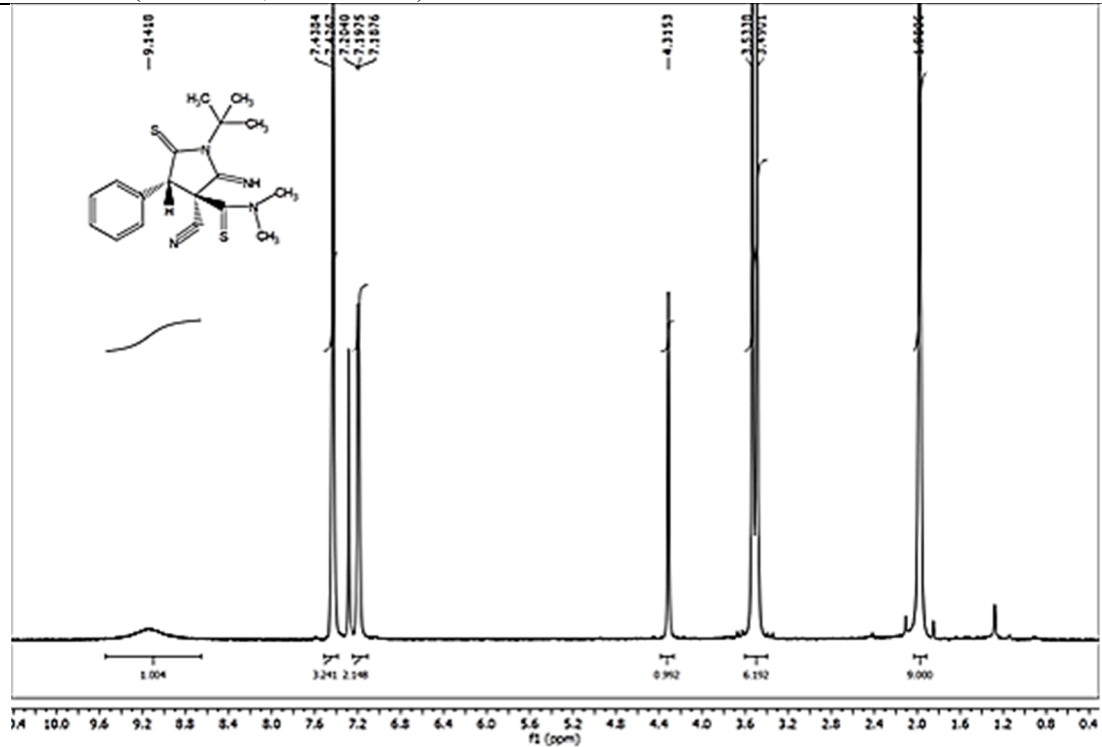

**5d:**  $^{13}\text{C}$  NMR (100 MHz,  $\text{DMSO-}d_6$ )

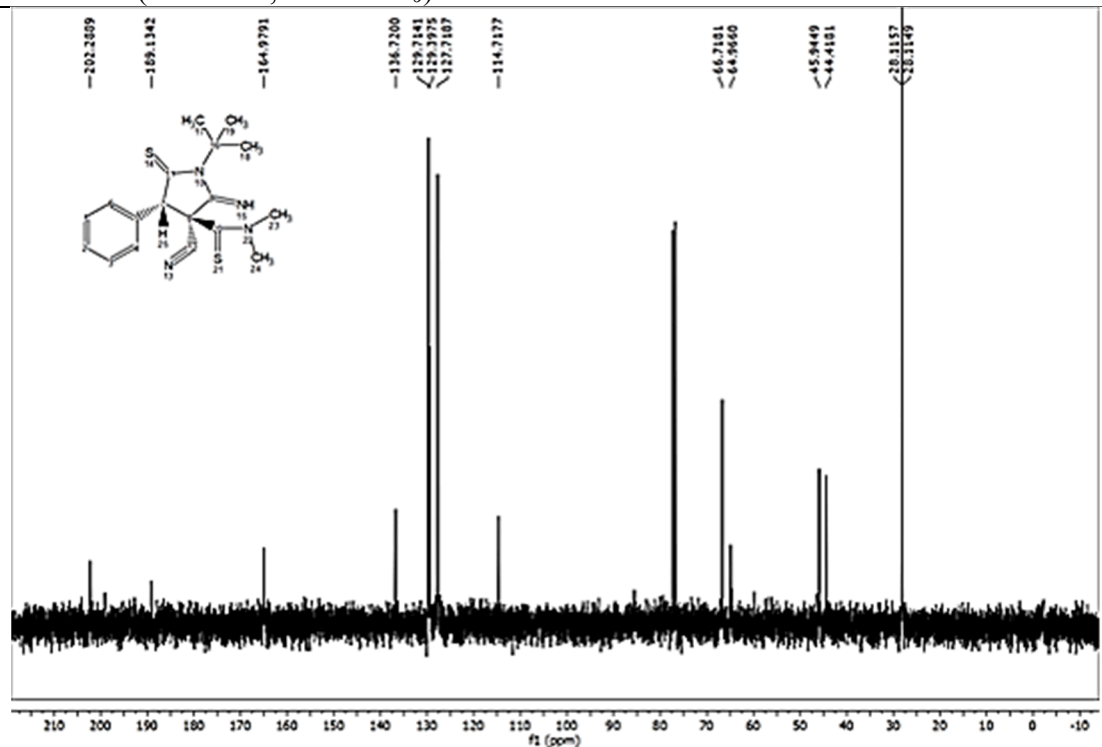

**5e:**  $^1\text{H}$  NMR (500 MHz,  $\text{CDCl}_3$ )

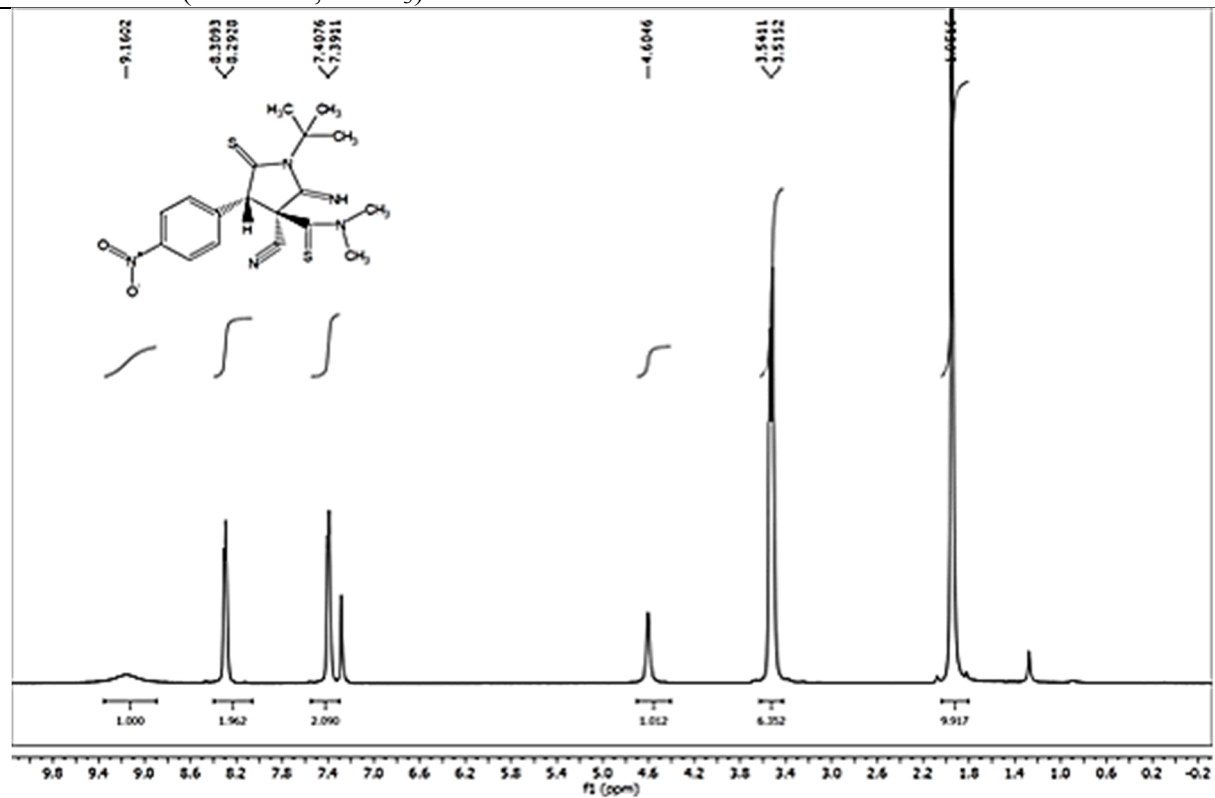

**5e:**  $^{13}\text{C}$  NMR (100 MHz,  $\text{CDCl}_3$ )

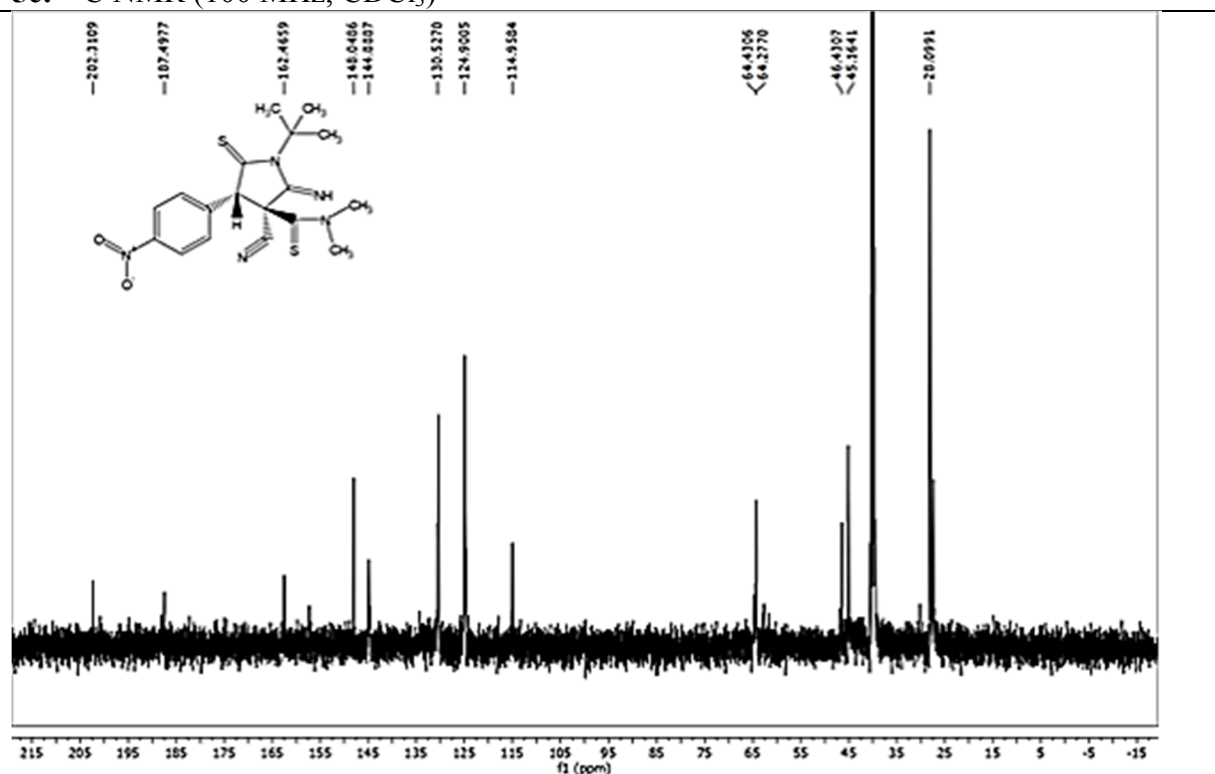

**5f:**  $^1\text{H}$  NMR (500 MHz,  $\text{CDCl}_3$ )

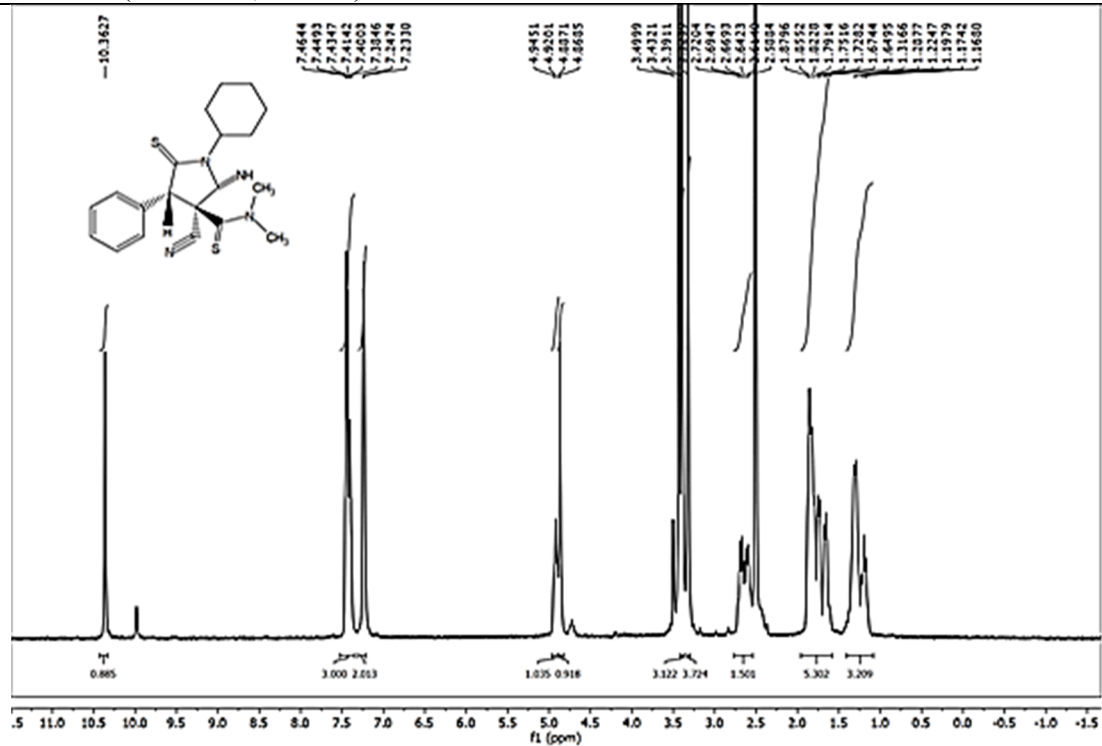

**5f:**  $^{13}\text{C}$  NMR (100 MHz,  $\text{DMSO}-d_6$ )

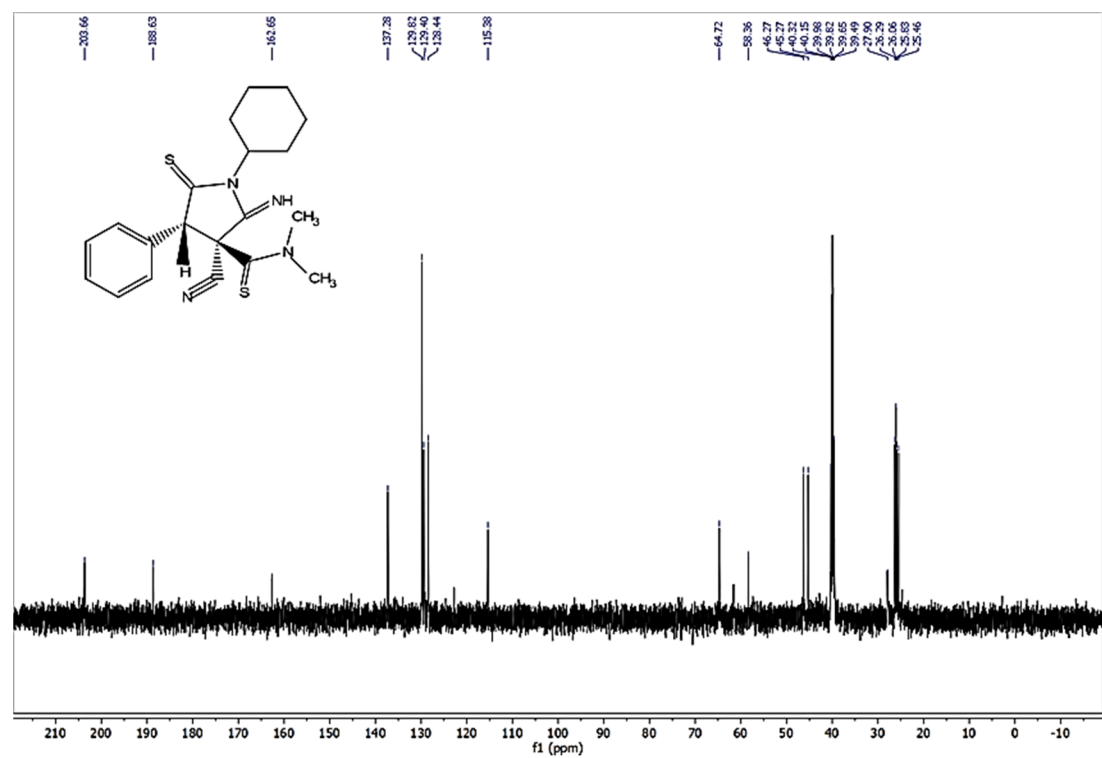

**5g:**  $^1\text{H}$  NMR (500 MHz,  $\text{DMSO}-d_6$ )

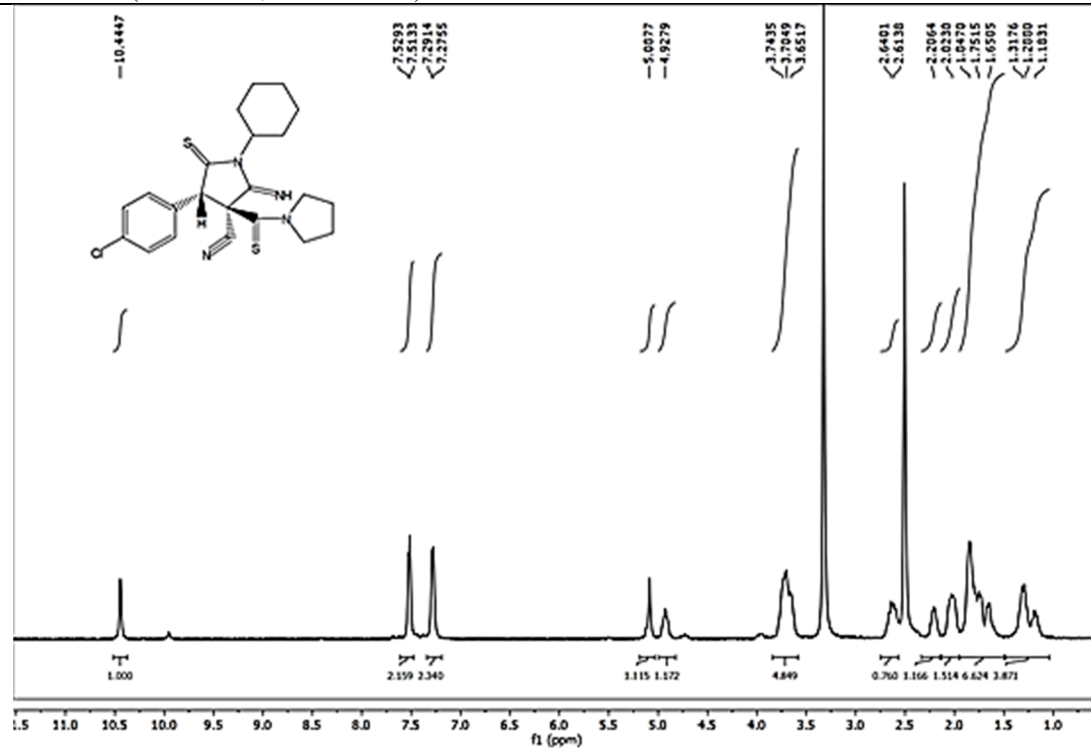

**5g:**  $^{13}\text{C}$  NMR (100 MHz,  $\text{DMSO}-d_6$ )

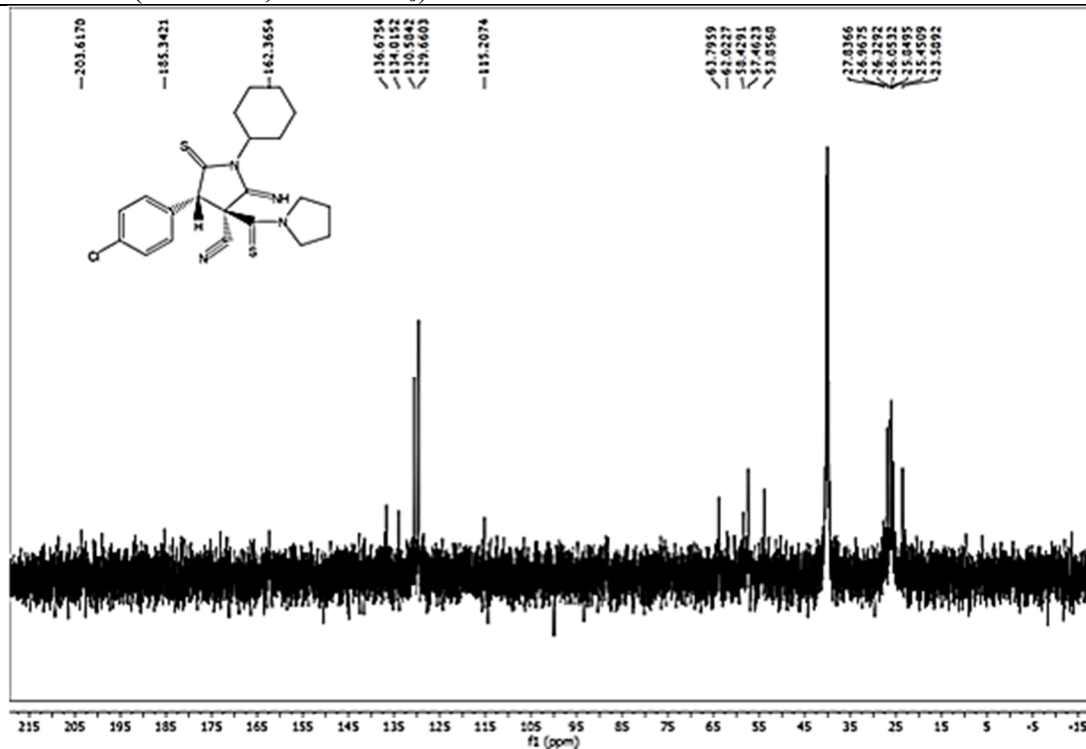



**5h:**  $^1\text{H}$  NMR (500 MHz,  $\text{CDCl}_3$ )

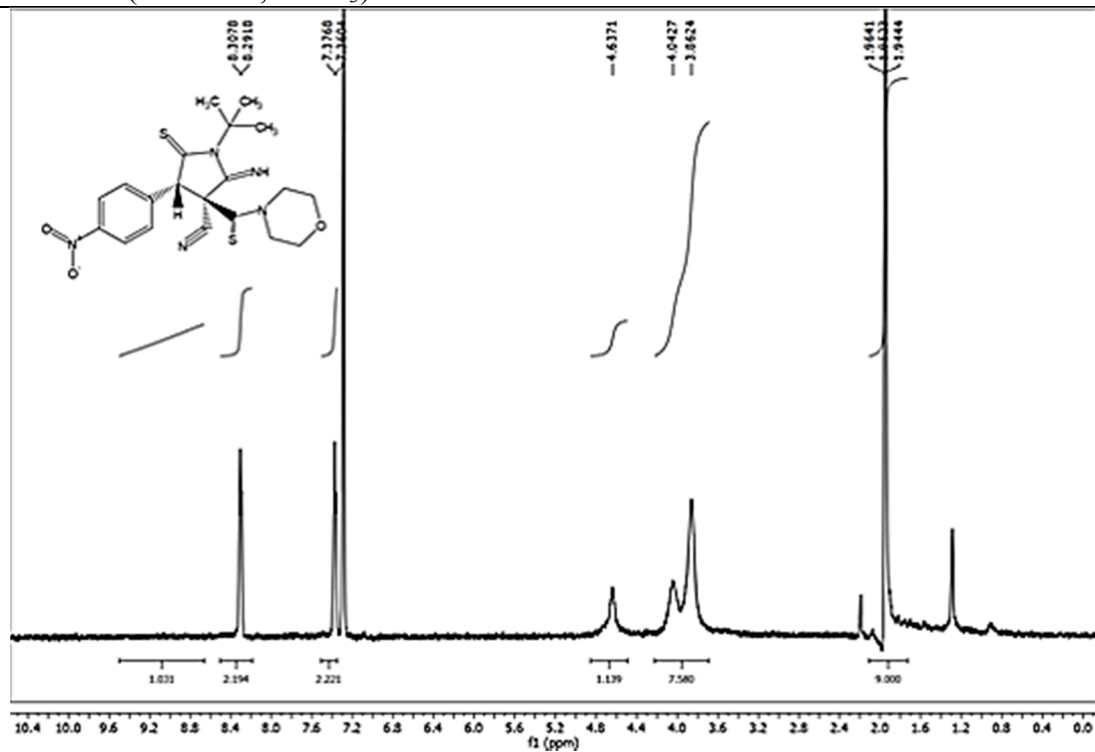

**5h:**  $^{13}\text{C}$  NMR (100 MHz,  $\text{CDCl}_3$ )

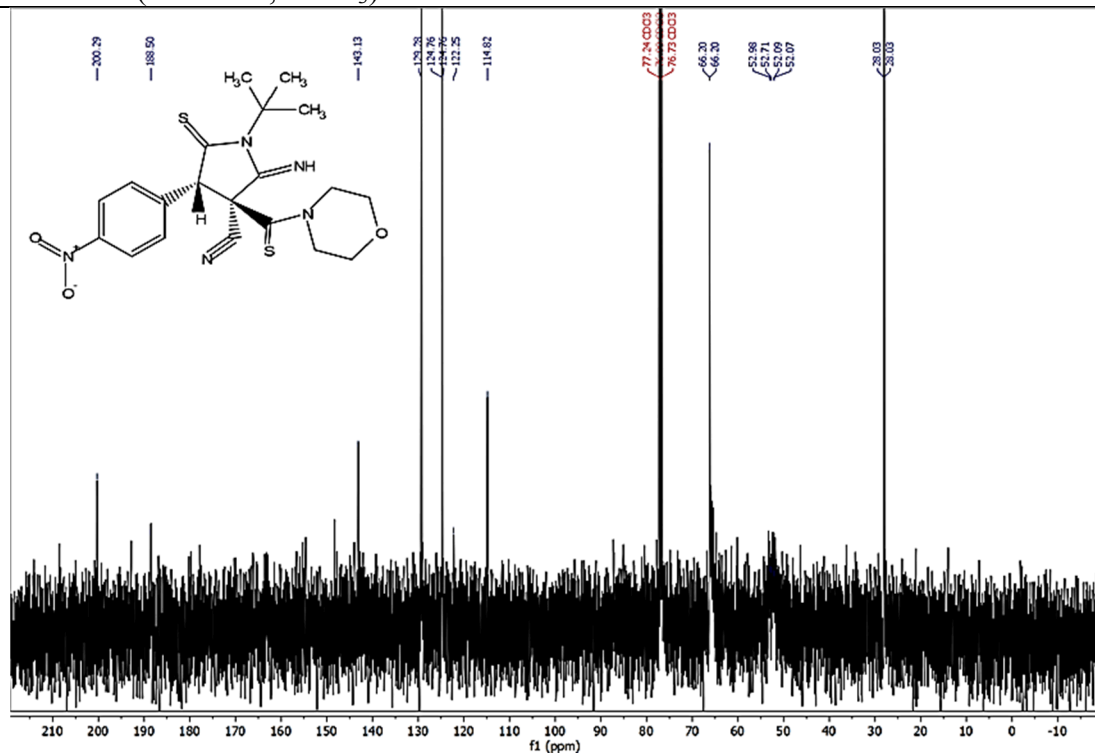

**5i:**  $^1\text{H}$  NMR (500 MHz,  $\text{CDCl}_3$ )

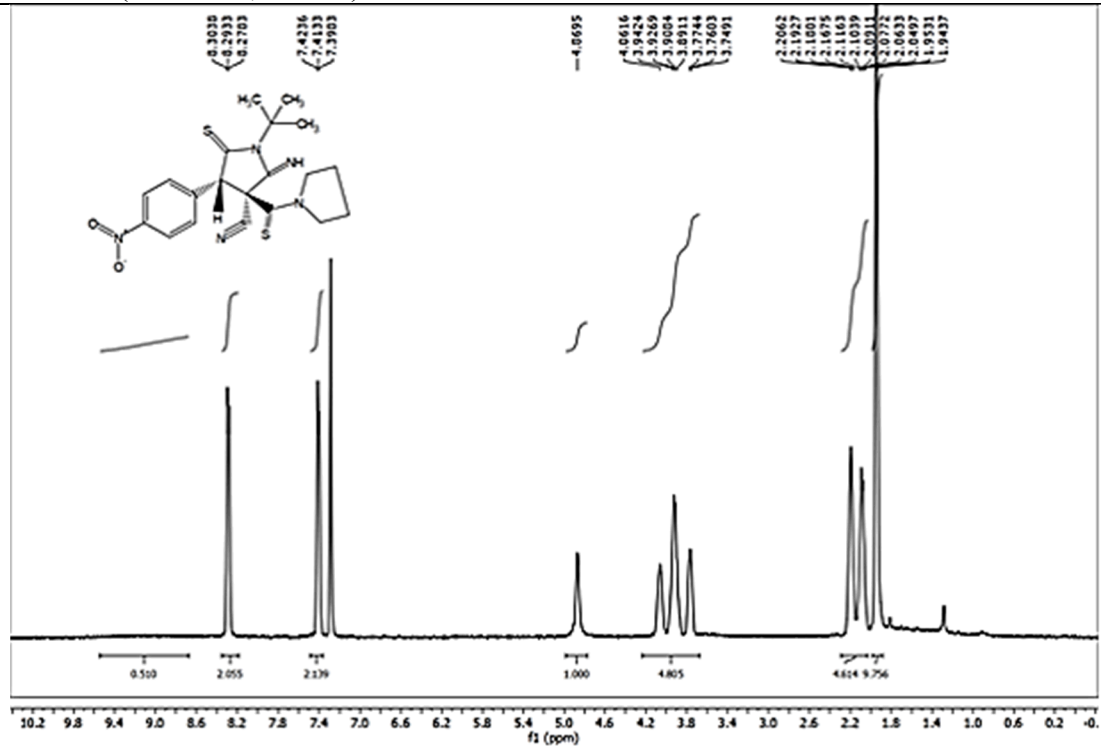

**5i:**  $^{13}\text{C}$  NMR (100 MHz,  $\text{CDCl}_3$ )

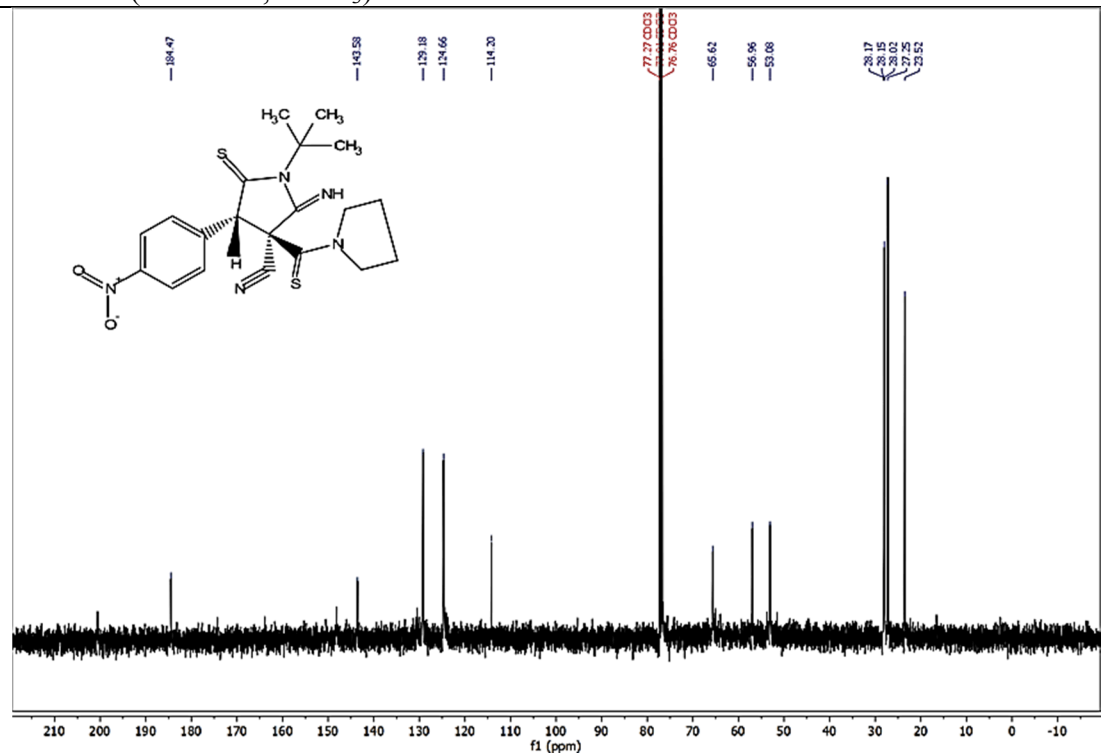

**5j:**  $^1\text{H}$  NMR (500 MHz,  $\text{CDCl}_3$ )

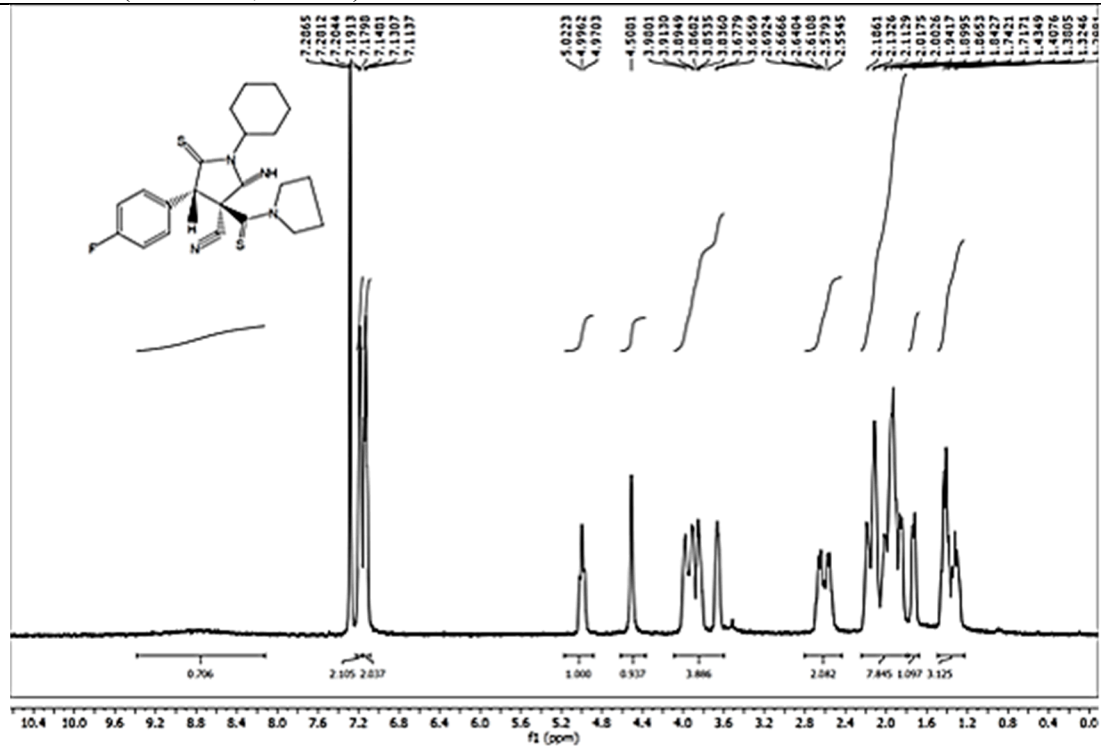

**5j:**  $^{13}\text{C}$  NMR (100 MHz,  $\text{CDCl}_3$ )

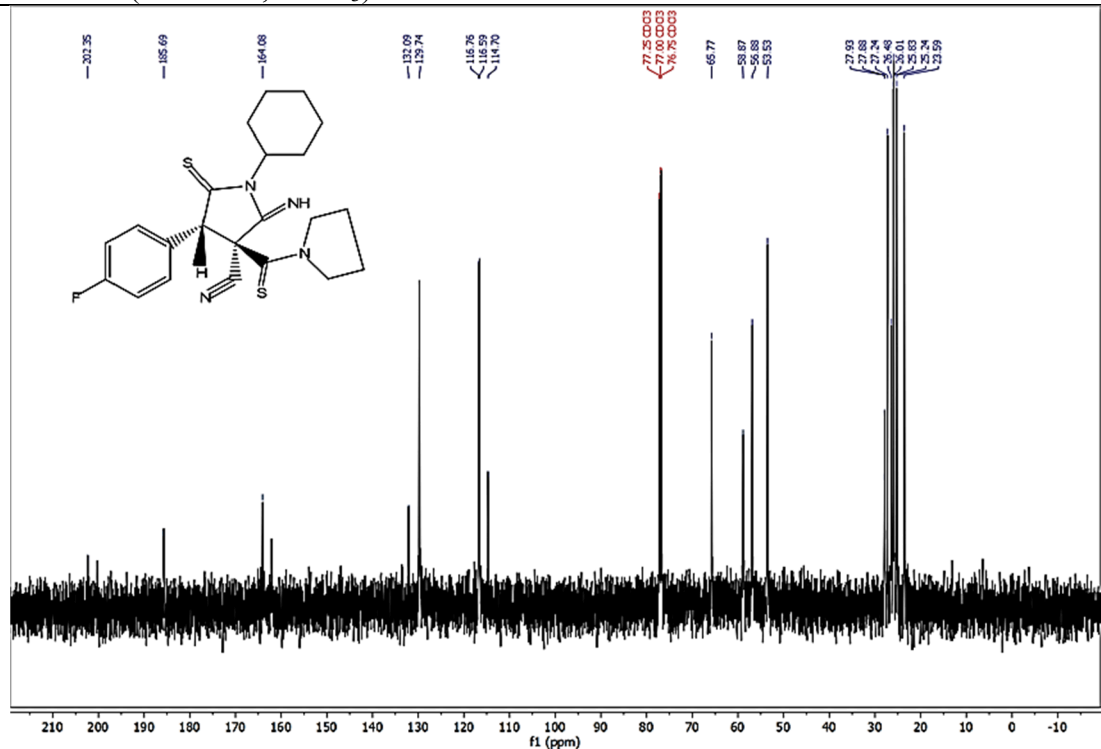

**5k:**  $^1\text{H}$  NMR (500 MHz,  $\text{CDCl}_3$ )

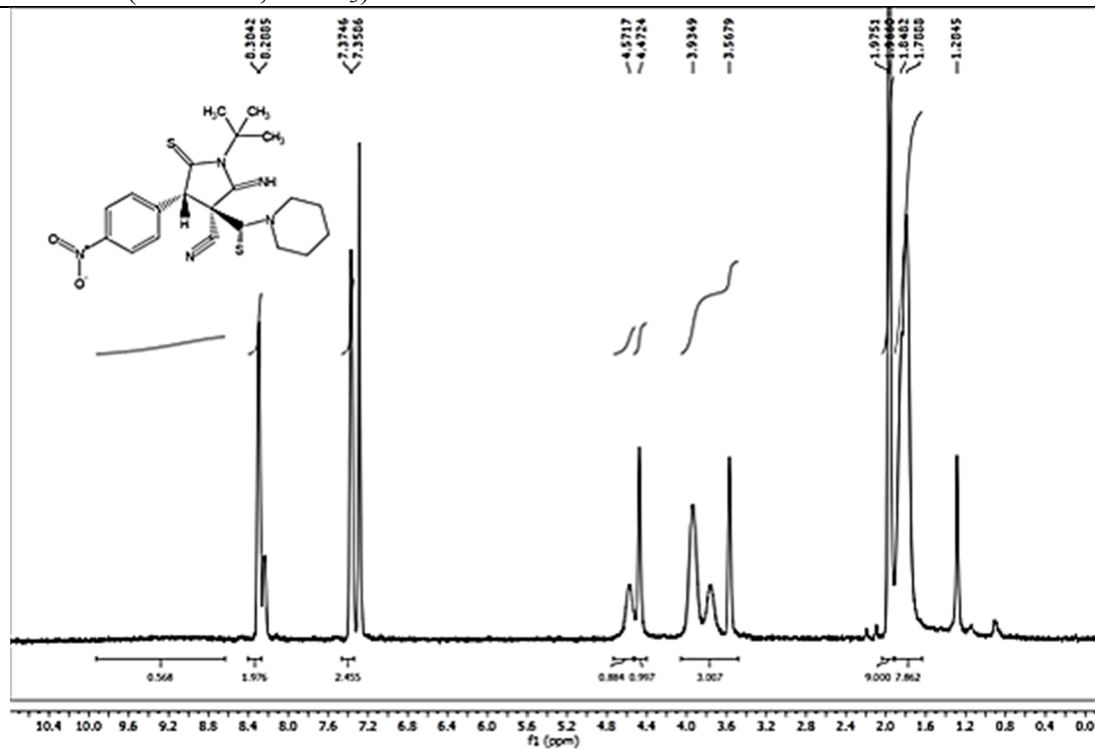

**5k:**  $^{13}\text{C}$  NMR (100 MHz,  $\text{CDCl}_3$ )

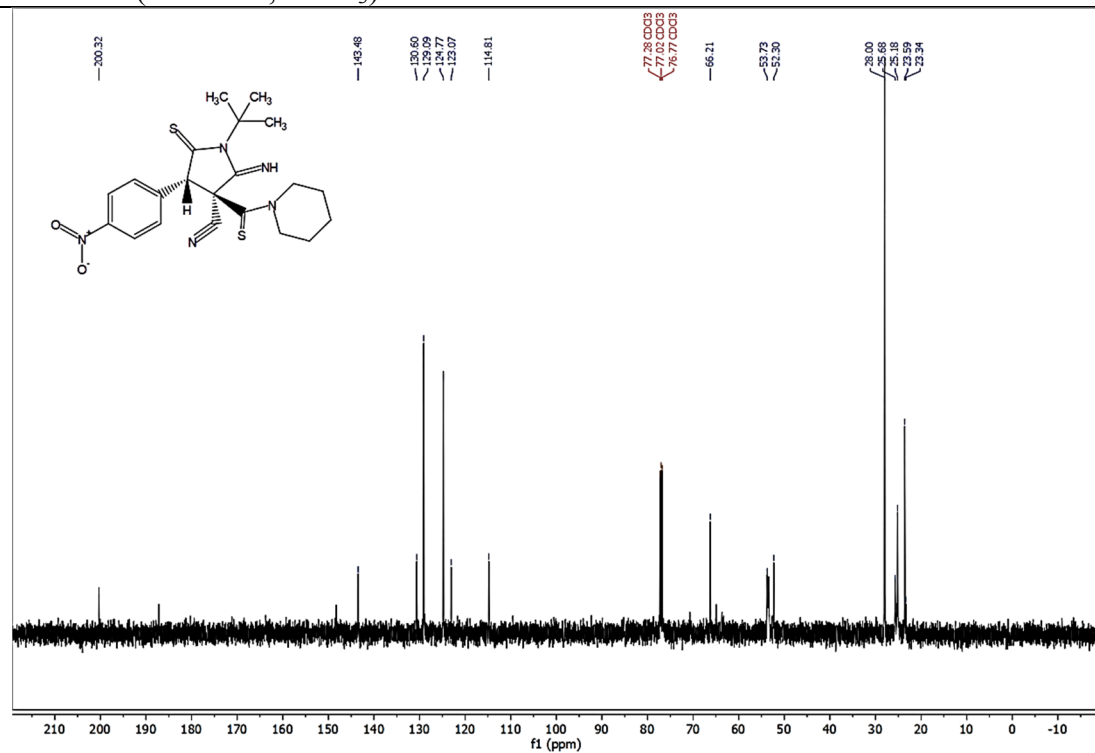

**5l:  $^1\text{H}$  NMR (500 MHz,  $\text{CDCl}_3$ )**

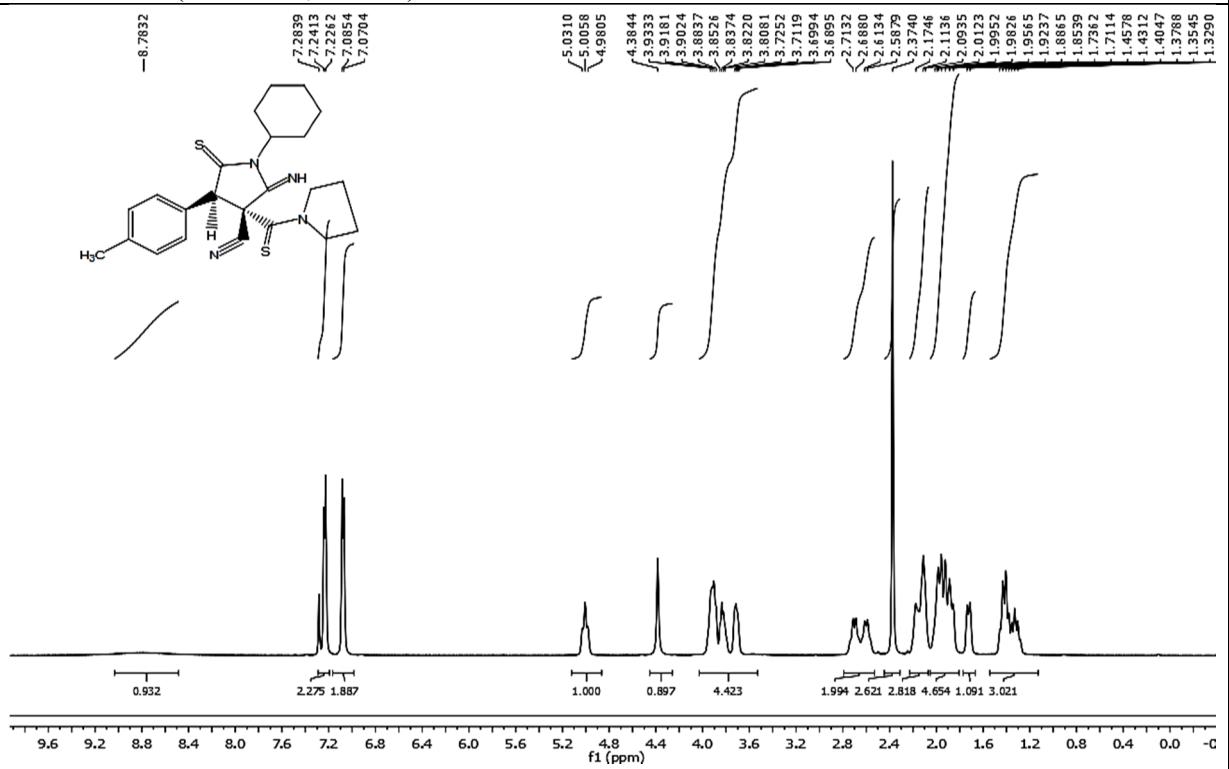

**5l:  $^{13}\text{C}$  NMR (100 MHz,  $\text{CDCl}_3$ )**

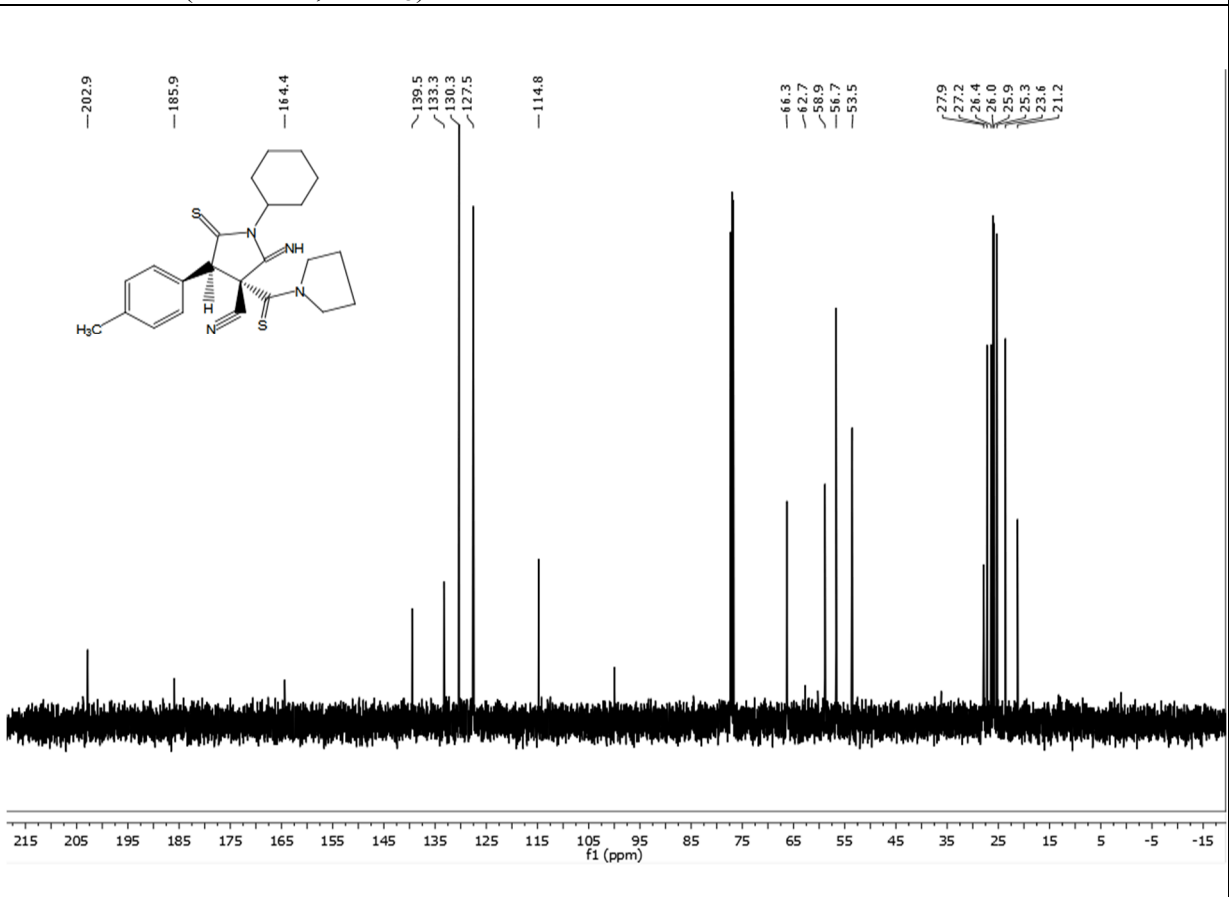

Supplement: d0nj00691b1.pdf [file d0nj00691b1.pdf]
